# Supplementary material
Source: PubMed Central journal article supplement (PMC7678670)
Supplement: str-51-3570-s001.pdf [file str-51-3570-s001.pdf]

## COVID-19 and ischemic stroke: a multi-center study

Kimon Bekelis, M.D., Symeon Missios, M.D., Javaad Ahmad, M.D., Nicos Labropoulos, Ph.D., Clemens M. Schirmer, M.D., Ph.D., Daniel R. Calnan, M.D., Ph.D., Jonathan Skinner, Ph.D., Todd A. MacKenzie, Ph.D.

### **Supplemental Material**

#### **Appendix**

##### Table of contents

Page II - Table A-I. Variable Definitions

Page III - Figure A-I. Flowchart of patients examined in study

Page IV - Figure A-II. Forest plot demonstrating the association of COVID-19 and traditional cardiovascular risk factors with the risk of stroke Figure A2. Scatterplot of the weekly cases of COVID-19 and ischemic stroke

Page V – Figure A-III. Scatterplot of the weekly cases of COVID-19 and ischemic stroke

Table A-I. Variable Definitions

| Variable                              | ICD-10 Code           |
|---------------------------------------|-----------------------|
| Coronary artery disease               | I23.1                 |
| Chronic obstructive pulmonary disease | J44                   |
| Congestive heart failure              | I50.2, I50.4          |
| Diabetes mellitus                     | E08, E09, E10,<br>E11 |
| Chronic renal failure                 | N18                   |
| Hypertension                          | I10, I15              |
| Coagulopathy                          | D68.9                 |
| Hypercholesterolemia                  | E78                   |
| Obesity                               | E66                   |
| Smoking                               | F17, Z72              |
| Alcohol                               | F10                   |
| Peripheral vascular disease           | I73                   |

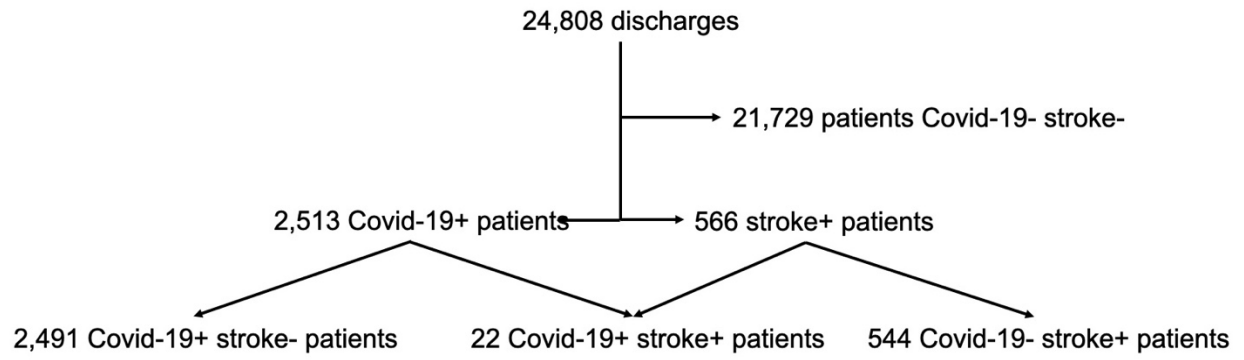

Figure A-I. Flowchart of patients included in study

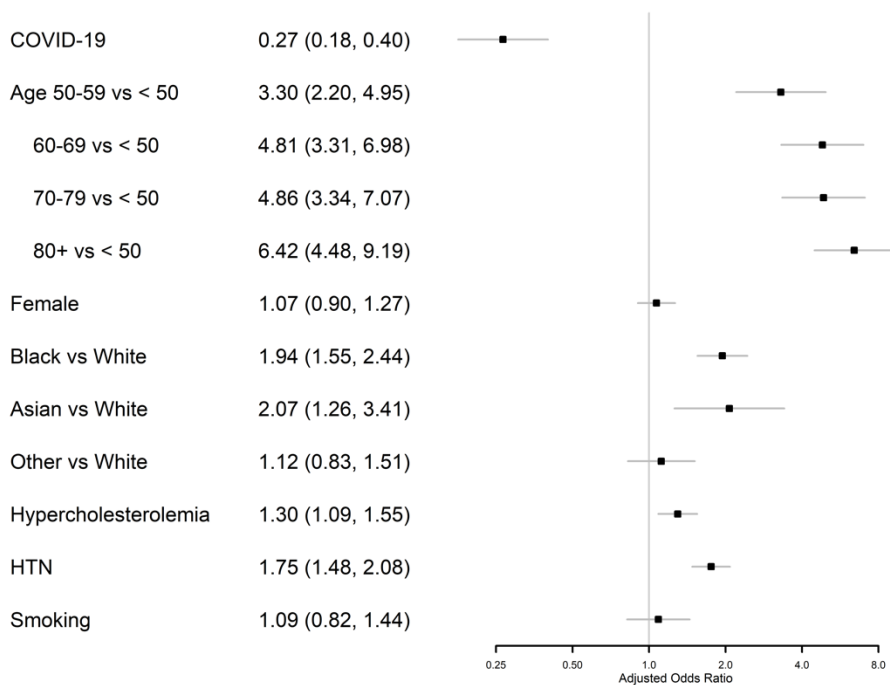

**Figure A-II.** Forest plot demonstrating the association of COVID-19 and traditional cardiovascular risk factors with the risk of stroke. Odds Ratios and 95% Confidence Intervals are represented. These models were additionally controlled for insurance status, chronic obstructive pulmonary disease, coronary artery disease, alcohol abuse, congestive heart failure, and chronic renal failure. HypChol stands for Hypercholesterolemia

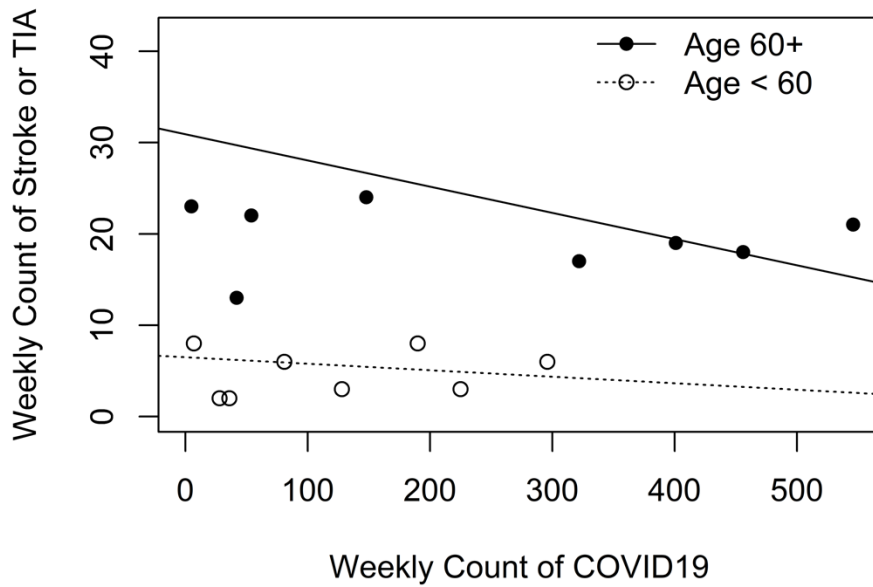

**Figure A-III.** Scatterplot of the weekly cases of COVID-19 and ischemic stroke among patients since the first week of COVID-19, displayed separately for patients over and under 60 years old. Two lines were fitted to reflect the association of COVID-19 and ischemic stroke for patients under 60 (Pearson correlation coefficient = -0.575,  $P < 0.05$ ) and over 60 years old (Pearson correlation coefficient = -0.234,  $P < 0.05$ ). Only weeks with COVID-19 cases recorded were included in this analysis.
